# Supplementary material for: Nanoengineered Mn 3 O 4 /rGO electrophotocatalyst with dual functionality for detection of 2,4,6-trichlorophenol and degradation of methylene blue dye in environmental monitoring and cleanup
Source: Royal Society of Chemistry journal article supplement (doi:10.1039/d5lf00149h), 2025-01-01
Supplement: d5lf00149h1.pdf [file d5lf00149h1.pdf]

## Supplementary File

### **Nanoengineered Mn<sub>3</sub>O<sub>4</sub>/rGO Electrophoto-catalyst with Dual Functionality for Detection of 2,4,6-Trichlorophenol and Degradation of Methylene Blue Dye in Environmental Monitoring and Cleanup**

Diksha Singh<sup>1</sup>, Anshu Kumar Singh<sup>1</sup>, Ranjana Verma,<sup>2</sup> Jay Singh<sup>1\*</sup>

*<sup>1</sup>Department of Chemistry, Institute of Sciences, Banaras Hindu University, Varanasi (221005), Uttar Pradesh, India*

*<sup>2</sup>Department of Mechanical Engineering, Indian Institute of Technology, Banaras Hindu University (IIT-BHU), Varanasi, (221005), Uttar Pradesh, India*

**\*Corresponding author** (Email: [jaysingh.chem@bhu.ac.in](mailto:jaysingh.chem@bhu.ac.in); [jaimnnit@gmail.com](mailto:jaimnnit@gmail.com), ORCID ID: 0000-0002-3793-0450; Phone: +91-9871766453

**1. Characterization techniques-** The crystallite size of synthesized  $\text{Mn}_3\text{O}_4$  nanoparticles and  $\text{Mn}_3\text{O}_4/\text{rGO}$  NCs has been examined by X-ray diffraction (XRD) using a Rigaku D/Max 2200 diffractometer having  $\text{Cu K}\alpha$  radiation source at a wavelength of  $\lambda=1.5406 \text{ \AA}$ . FT-IR spectra of the material have been obtained with a PerkinElmer, Spectrum BX II FTIR spectrophotometer. Raman spectra have been documented in the range of  $200\text{-}2000 \text{ cm}^{-1}$  with the assistance of an argon-ion laser at  $514 \text{ nm}$ , employing a Renishaw Instruments Raman spectrometer. X-ray photoelectron spectroscopy (XPS) was achieved via an Axis-Nova, Kratos Analytical Ltd., Manchester, UK. Transmission electron microscopy (TEM) was used to determine the average particle size and shape of synthesized  $\text{Mn}_3\text{O}_4$  nanoparticles and  $\text{Mn}_3\text{O}_4/\text{rGO}$  NCs, employing a JEOL JEM-2200 FS (Japan) possesses a tungsten filament at an accelerating voltage of  $200 \text{ kV}$ , and surface morphology studies of synthesized  $\text{Mn}_3\text{O}_4$  nanoparticles and  $\text{Mn}_3\text{O}_4/\text{rGO}$  NCs via a LEO-440 scanning electron microscope at accelerating voltage of  $3 \text{ kV}$ . Corrtest CS studio 350 electrochemical workstations are employed to execute electrochemical experiments through CV, DPV, as well as EIS at room temperature (RT). We use a three-electrode arrangement comprising of modified ITO, platinum wire, and  $\text{Ag}/\text{AgCl}$  as working, counter, and reference electrodes in phosphate buffer saline (PBS,  $50 \text{ mM}$ ,  $\text{pH } 7.0$ ,  $0.9\% \text{ NaCl}$ ) comprising  $5 \text{ mM } [\text{Fe}(\text{CN})_6]^{3-/4-}$  as a mediator. CV was operated at a scan rate ( $v$ ) of  $50 \text{ mV/s}$  and a potential window from  $-0.5 \text{ V}$  to  $0.7 \text{ V}$ . The optimized employed parameters for DPV are amplitude ( $V = 0.05$ ), pulse width ( $s = 0.1$ ), and pulse period ( $s = 0.5$ ). The EIS technique operates at the  $100,000$  to  $0.01 \text{ Hz}$  frequency range and an amplitude of  $5 \text{ mV}$ . Most of the electrochemical measurements were executed at room temperature.

## 2. Results and discussion of GO and rGO-

**(a) XRD study:** GO is considered by the sharp peak at the angle  $2\theta$  at  $11.02^\circ$  corresponding to the (001) plane, and for rGO, it has a characteristic broad peak at nearly  $2\theta$  at  $25.8^\circ$  corresponding to the (002) plane, as it is represented in Figure S1(a).

**(b) Raman study:** Two bands, G and D, appear in the Raman spectra of GO and rGO. The G band is located around  $1583\text{ cm}^{-1}$ , and the D band is around  $1360\text{ cm}^{-1}$  in GO (1). The G band results from  $\text{sp}^2$  carbon vibration in the graphitic carbon. The D band originates due to the disordered vibration in carbon atoms and structural defects on the surface of the nanomaterial (1,2). In rGO, the D peak shifts to  $1348\text{ cm}^{-1}$ , and the G band at around  $1578\text{ cm}^{-1}$  (3). For GO, the  $I_D/I_G$  ratio is 0.93, and for rGO, it is 0.96 as it is represented in Figure S1(b).

**(c) FTIR study:** GO exhibits strong absorption FTIR bands at  $3430\text{ cm}^{-1}$  corresponding to the O-H component of the adsorbed water molecules and carboxylic acid,  $1630\text{ cm}^{-1}$  attributed to the carbonyl group,  $1055\text{ cm}^{-1}$  and  $585\text{ cm}^{-1}$  attributed to the stretching and bending band of the C-O-C bond of the epoxy group. For rGO,  $3436\text{ cm}^{-1}$  corresponds to the O-H component of the adsorbed water molecules. From FTIR spectra, we found that most of the functional groups are diminished or reduced in rGO as compared to GO, which validates the successful reduction of GO into rGO as it is represented in Figure S1(c) which further validates from the EDAX mapping where it confirms from the weight% and atomic% matrix of the GO and rGO where rGO having less oxygen content than GO.

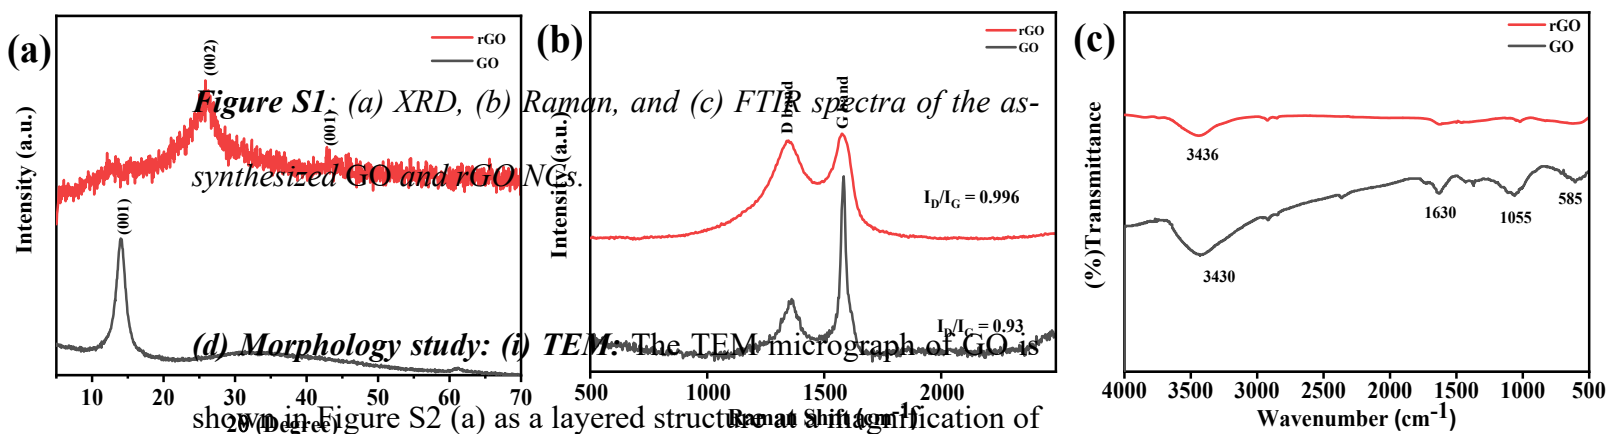

shown in Figure S2 (a) as a layered structure at a magnification of 100 nm scale. Similarly, the TEM of rGO is shown in Figure S2 (d) as a layered structure at a magnification of 50 nm.

**(ii) SEM and EDAX:** SEM of the GO shown in Figure S2 (b) as a folded layered structure at a magnification of 200 nm. Similarly, the SEM of rGO is shown in Figure S2 (e) as a layered structure at a magnification of 200 nm. From the SEM image of GO, it has more folds than rGO. The curved rGO surface specifies the elimination of the oxygen-bearing functional group, which is further validated by the EDAX image of the GO and rGO shown in Figures S2 (c) and S2 (f), as element weight% and atomic% signify that there is less oxygen-containing functional group in rGO than in GO. As we know that there are various oxygen-bearing functional groups (OFs) like epoxy, carbonyl, hydroxyl, and carboxyl groups (4), and these are non-conducting nature of GO is due to the hindrance created in conjugation via the OFs. rGO is chemically and thermally reduced from GO, having fewer OFs and increased electrical conductivity.

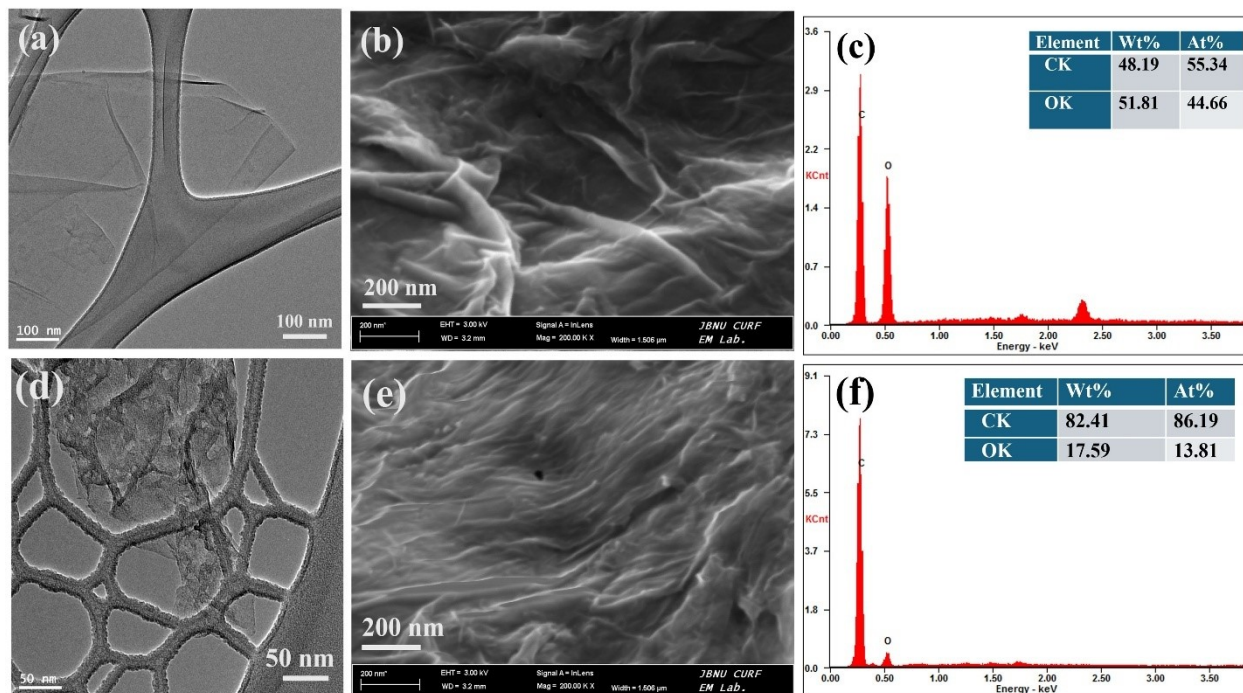

**Figure S2:** (a) The TEM portrait of the GO, (b) The SEM portrait of GO NMs, (c) EDS energy spectrum of GO NMs, (d) The TEM portrait of the rGO, (e) The SEM portrait of rGO NMs, (f) EDS energy spectrum of rGO NMs.

**3. Photocatalytic Degradation experiments-** The photocatalytic action of individual samples was examined under UV and Visible light to demonstrate the degradation of methylene blue (MB). Here, we prepared a 20 ppm solution of MB dye, and 30 mg of the catalyst was mixed into 30 mL of this dye solution and kept in the dark for 1 hr to attain adsorption-desorption equilibrium for  $\text{Mn}_3\text{O}_4$  and  $\text{Mn}_3\text{O}_4/\text{rGO}$ , respectively. The catalyst-loaded MB solution is kept under UV and Visible light separately, and sampling is carried out at every 10-minute intervals. The catalyst  $\text{Mn}_3\text{O}_4/\text{rGO}$  degrades MB in irradiation of the UV light, and the catalyst  $\text{Mn}_3\text{O}_4$  shows minute degradation. Both catalysts show very minute degradation in irradiation of Visible light. So, we performed degradation in UV light, during the given time interval, the solution is centrifuged and

examined by recording the peculiarity of the absorption determined at 664 nm utilizing a Shimadzu 1900, UV-visible spectrophotometer.

**3.1. Photodegradation of MB dye with rGO:** For this experiment, a 20 ppm solution of the dye was prepared. Then, 30 mg of the rGO was mixed into 30 mL of this dye solution. This solution was mixed continuously in the dark for 60 minutes to allow the MB dye and the rGO to reach a stable adsorption-desorption state. After this initial phase, the solution was exposed to UV light to monitor how effectively the dye was broken down in the proximity of the rGO. Throughout the experiment, a rGO solution with MB of approximately 3 mL was taken from the dye solution after every 10 minutes using a micropipette to track the progress of the degradation process. The magnitude of the absorption peak at 664 nm, characteristic of MB, was observed to decrease. A substantial drop in this absorption intensity was observed within 80 minutes when using the rGO catalyst. The MB dye degradation reached up to 50% with the rGO catalyst when exposed to UV light for 80 minutes, as presented in Figure S3. Figure S4 represents absorption spectra of the scavenging analysis in the presence and absence of different scavengers.

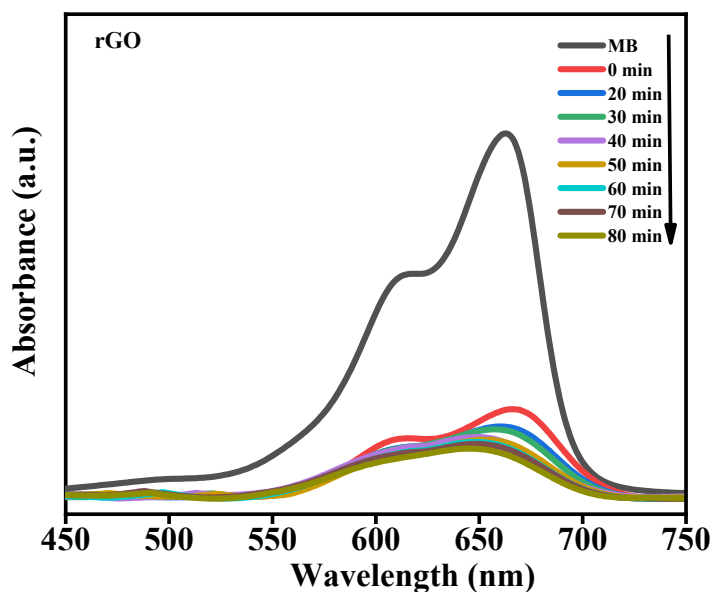

**Figure S3:** Absorption spectra showing the breakdown of MB in the presence of rGO

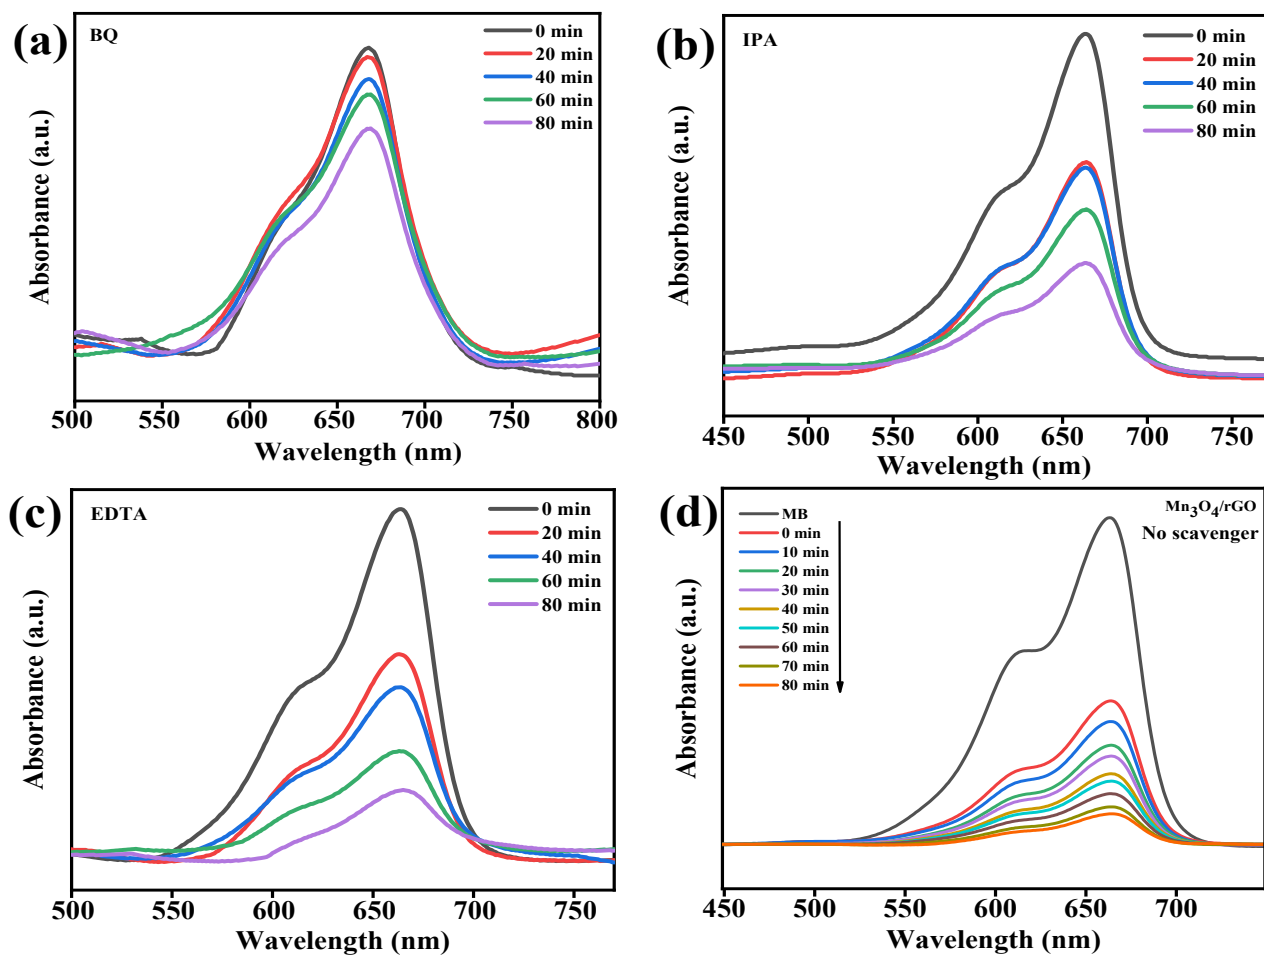

**Figure S4** Photodegradation of methylene blue (MB) dye using Mn<sub>3</sub>O<sub>4</sub>/rGO NCs with (a) p-benzoquinone (pBQ)- superoxide radical scavenger (b) IPA hydroxyl radical scavenger (c) EDTA hole scavenger (d) No scavenger

**Table S1- Scan rate analysis of Mn<sub>3</sub>O<sub>4</sub>/rGO/ITO electrode during 2,4,6-TCP sensing**

| S. No. | Scan Rate<br>(mV/s) | Square root<br>of Scan Rate | E <sub>pa</sub> (V) | E <sub>pc</sub> (V) | E= (E <sub>pa</sub> -E <sub>pc</sub> )<br>in mV |
|--------|---------------------|-----------------------------|---------------------|---------------------|-------------------------------------------------|
| 1.     | 10                  | 3.1622776602                | 0.348335613         | 0.176607387         | 171.728226                                      |
| 2.     | 20                  | 4.472135955                 | 0.368445052         | 0.158093935         | 210.351117                                      |
| 3.     | 30                  | 5.4772255751                | 0.383128135         | 0.149156407         | 233.971728                                      |
| 4.     | 40                  | 6.3245553203                | 0.392065663         | 0.142134063         | 249.9316                                        |
| 5.     | 50                  | 7.0710678119                | 0.403237574         | 0.129685363         | 273.552211                                      |
| 6.     | 60                  | 7.7459666924                | 0.412813497         | 0.125535796         | 287.277701                                      |
| 7.     | 70                  | 8.366602653                 | 0.416005472         | 0.123620611         | 292.384861                                      |
| 8.     | 80                  | 8.94427191                  | 0.423027816         | 0.110852713         | 312.175103                                      |
| 9.     | 90                  | 9.4868329805                | 0.429411765         | 0.112129503         | 317.282262                                      |
| 10.    | 100                 | 10                          | 0.429730962         | 0.104149567         | 325.581395                                      |



**Table S2- Response time analysis of Mn<sub>3</sub>O<sub>4</sub>/rGO/ITO electrode**

| <b>S. No.</b> | <b>Response time<br/>(Second)</b> | <b>Current (mA)</b> | <b>Recovery<br/>percent (%)</b> | <b>RSD (%)</b> |
|---------------|-----------------------------------|---------------------|---------------------------------|----------------|
| 1.            | 0                                 | 0.928720996         | 100                             | 0              |
| 2.            | 5                                 | 0.946179966         | 101.88                          | 1.88           |
| 3.            | 10                                | 0.946179966         | 101.88                          | 1.88           |
| 4.            | 15                                | 0.944142615         | 101.66                          | 1.66           |
| 5.            | 20                                | 0.944142615         | 101.66                          | 1.66           |
| 6.            | 25                                | 0.94516129          | 101.77                          | 1.77           |
| 7.            | 30                                | 0.939388795         | 101.15                          | 1.15           |
| 8.            | 35                                | 0.936332767         | 100.82                          | 0.82           |
| 9.            | 40                                | 0.935314092         | 100.71                          | 0.71           |

|     |    |             |        |      |
|-----|----|-------------|--------|------|
| 10. | 45 | 0.933616299 | 100.53 | 0.53 |
| 11. | 50 | 0.929881154 | 100.13 | 0.13 |
| 12. | 55 | 0.893237125 | 96.18  | 3.82 |
| 13. | 60 | 0.891680815 | 96.01  | 3.99 |
| 14. | 65 | 0.875183928 | 94.24  | 5.76 |

**Table S3- Stability analysis of Mn<sub>3</sub>O<sub>4</sub>/rGO/ITO electrode**

| <b>S. No.</b> | <b>Number of days</b> | <b>Current (mA)</b> | <b>Recovery percent (%)</b> | <b>RSD (%)</b> |
|---------------|-----------------------|---------------------|-----------------------------|----------------|
| 1.            | 1                     | 0.896774194         | 100                         | 0              |
| 2.            | 2                     | 0.897849462         | 100.12                      | 0.12           |
| 3.            | 3                     | 0.896236559         | 99.94                       | 0.06           |
| 4.            | 4                     | 0.899462366         | 100.29                      | 0.29           |
| 5.            | 5                     | 0.903225806         | 100.72                      | 0.72           |
| 6.            | 10                    | 0.901075269         | 100.48                      | 0.48           |

|     |    |             |        |      |
|-----|----|-------------|--------|------|
| 7.  | 15 | 0.901612903 | 100.54 | 0.54 |
| 8.  | 20 | 0.9         | 100.36 | 0.36 |
| 9.  | 25 | 0.895698925 | 99.88  | 0.12 |
| 10. | 30 | 0.898924731 | 100.24 | 0.24 |
| 11. | 35 | 0.899462366 | 100.29 | 0.29 |
| 12. | 40 | 0.897849462 | 100.12 | 0.12 |
| 13. | 45 | 0.896774194 | 100.00 | 0.00 |
| 14. | 50 | 0.897849462 | 100.12 | 0.12 |
| 15. | 55 | 0.896236559 | 99.94  | 0.06 |
| 16. | 60 | 0.895698925 | 99.88  | 0.12 |

**Table S4- Reusability analysis of Mn<sub>3</sub>O<sub>4</sub>/rGO/ITO electrode**

| <b>S. No.</b> | <b>Number of Scans</b> | <b>Current (mA)</b> | <b>Recovery percent (%)</b> | <b>RSD (%)</b> |
|---------------|------------------------|---------------------|-----------------------------|----------------|
| 1.            | 1 Scan                 | 0.682314658         | 100                         | 0              |
| 2.            | 2 Scan                 | 0.682767402         | 100.07                      | 0.07           |
| 3.            | 3 Scan                 | 0.684804754         | 100.37                      | 0.37           |
| 4.            | 4 Scan                 | 0.686162988         | 100.55                      | 0.55           |
| 5.            | 5 Scan                 | 0.686842105         | 100.66                      | 0.66           |
| 6.            | 6 Scan                 | 0.685936616         | 100.53                      | 0.53           |

|     |         |             |        |       |
|-----|---------|-------------|--------|-------|
| 7.  | 7 Scan  | 0.683899264 | 100.23 | 0.23  |
| 8.  | 8 Scan  | 0.685710243 | 100.49 | 0.49  |
| 9.  | 9 Scan  | 0.67416525  | 98.81  | 1.19  |
| 10. | 10 Scan | 0.666242218 | 97.65  | 2.35  |
| 11. | 11 Scan | 0.648005093 | 94.97  | 5.03  |
| 12. | 12 Scan | 0.649702886 | 95.22  | 4.78  |
| 13. | 13 Scan | 0.644821732 | 94.51  | 5.49  |
| 14. | 14 Scan | 0.643972835 | 94.38  | 5.62  |
| 15. | 15 Scan | 0.626358234 | 91.79  | 8.21  |
| 16. | 16 Scan | 0.566808149 | 83.07  | 16.93 |

**Table S5- Interference analysis of the 2,4,6-TCP on the Mn<sub>3</sub>O<sub>4</sub>/rGO/ITO electrode**

| S. No. | Interferent with standard (50μM)  | Current (mA) | Recovery percent (%) | RSD (%) |
|--------|-----------------------------------|--------------|----------------------|---------|
| 1.     | 2,4,6-Trichlorophenol [2,4,6-TCP] | 0.840067912  | 100                  |         |
| 2.     | 2 Bromophenol+ 2,4,6-TCP          | 0.875721562  | 104.25               | 4.25    |
| 3.     | 4 Bromophenol+ 2,4,6-TCP          | 0.866044143  | 103.09               | 3.09    |
| 4.     | 2,4-Dibromophenol+ 2,4,6-TCP      | 0.834465195  | 99.33                | 0.664   |

|     |                               |             |        |      |
|-----|-------------------------------|-------------|--------|------|
| 5.  | 2-Chlorophenol+ 2,4,6-TCP     | 0.872156197 | 103.82 | 3.82 |
| 6.  | 4-Chlorophenol+ 2,4,6-TCP     | 0.86196944  | 102.61 | 2.61 |
| 7.  | 2,4-Dichlorophenol+ 2,4,6-TCP | 0.841595925 | 100.18 | 0.18 |
| 8.  | 2-Nitrophenol+ 2,4,6-TCP      | 0.848726655 | 101.03 | 1.03 |
| 9.  | 4-Nitrophenol+ 2,4,6-TCP      | 0.829371817 | 98.73  | 1.27 |
| 10. | 2,4-Dinitrophenol+ 2,4,6-TCP  | 0.841595925 | 100.18 | 0.18 |

**Table S6- Real Sample analysis of the 2,4,6-TCP on the Mn<sub>3</sub>O<sub>4</sub>/rGO/ITO electrode**

| S. No. | Real sample with standard (60μM) | Current (mA) | Determination of concentration in real sample (μM) | Recovery percent (%) | RSD (%) |
|--------|----------------------------------|--------------|----------------------------------------------------|----------------------|---------|
| 1.     | 2,4,6 -TCP (60 μM)               | 0.823259762  | 60                                                 | 100                  | 0       |
| 2.     | 2,4,6 -TCP (60 μM) +BW           | 0.855857385  | 62.38                                              | 103.96               | 3.96    |
| 3.     | 2,4,6 -TCP (60 μM)               | 0.834465195  | 60.82                                              | 101.36               | 1.36    |

|    |                                     |             |       |        |      |
|----|-------------------------------------|-------------|-------|--------|------|
|    | $\mu\text{M}$ ) +DW                 |             |       |        |      |
| 4. | 2,4,6 -TCP (60 $\mu\text{M}$ ) +GRW | 0.870628183 | 63.45 | 105.75 | 5.75 |
| 5. | 2,4,6-TCP (60 $\mu\text{M}$ ) +TW   | 0.860441426 | 62.71 | 104.52 | 4.52 |

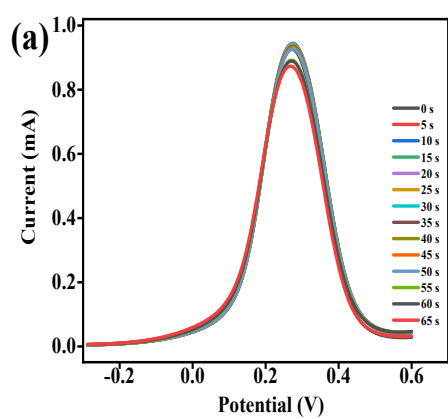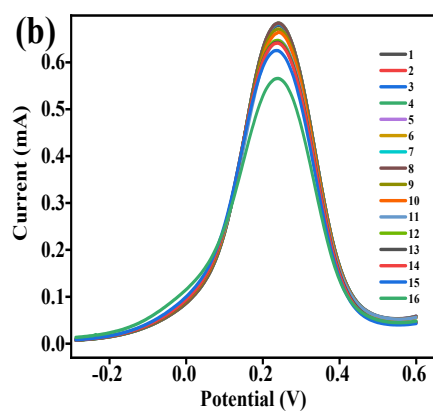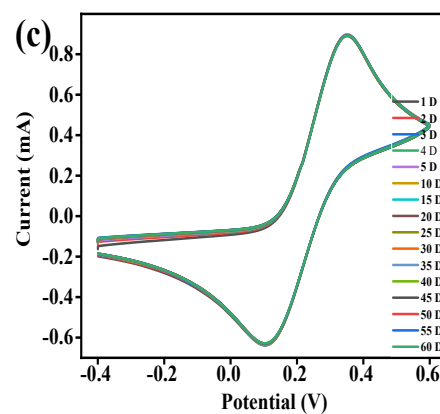

**Figure S5:** (a) CV Curve of Response time (b) Reusability and (c) Stability analysis of the prepared  $Mn_3O_4/rGO/ITO$  electrode

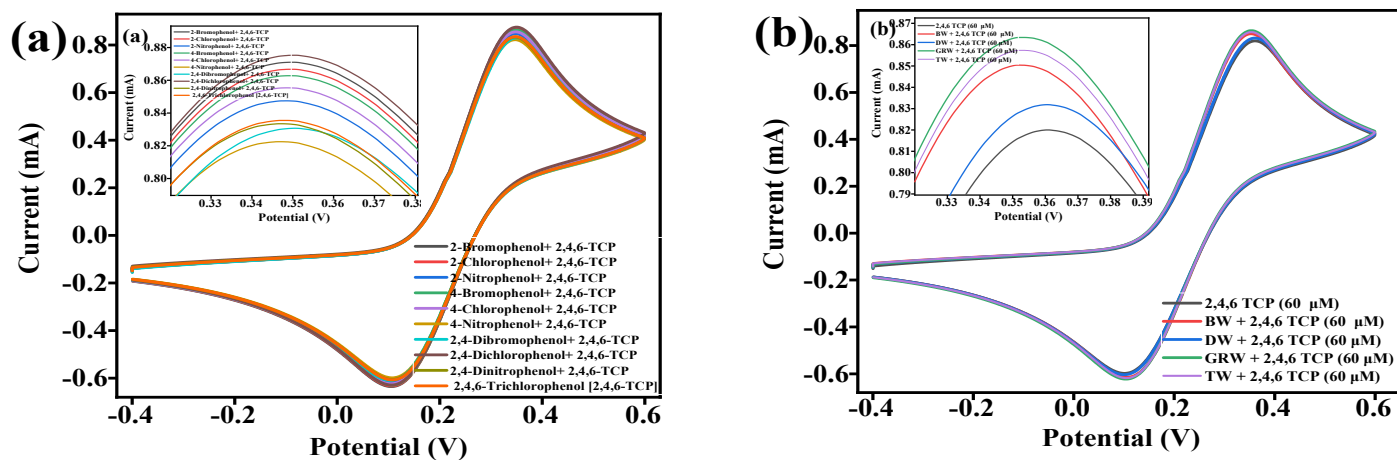

**Figure S6:** (a) CV Curve of Interference study of 2,4,6-TCP and (b) Real sample analysis of 2,4,6-TCP on  $Mn_3O_4/rGO/ITO$  electrode.

**Figure S7:** Tem Image  $Mn_3O_4$

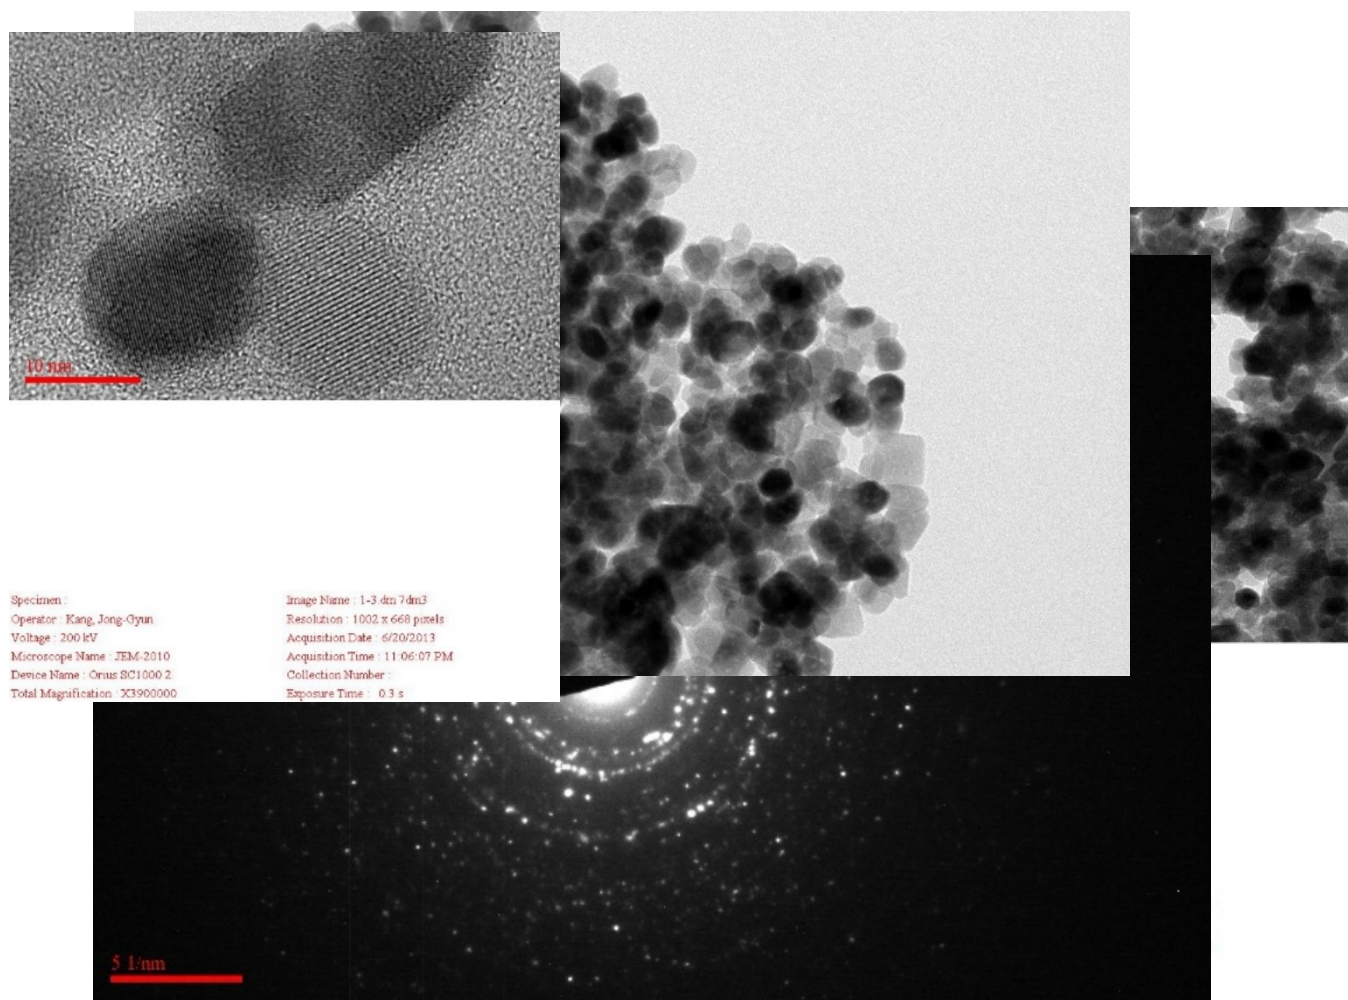

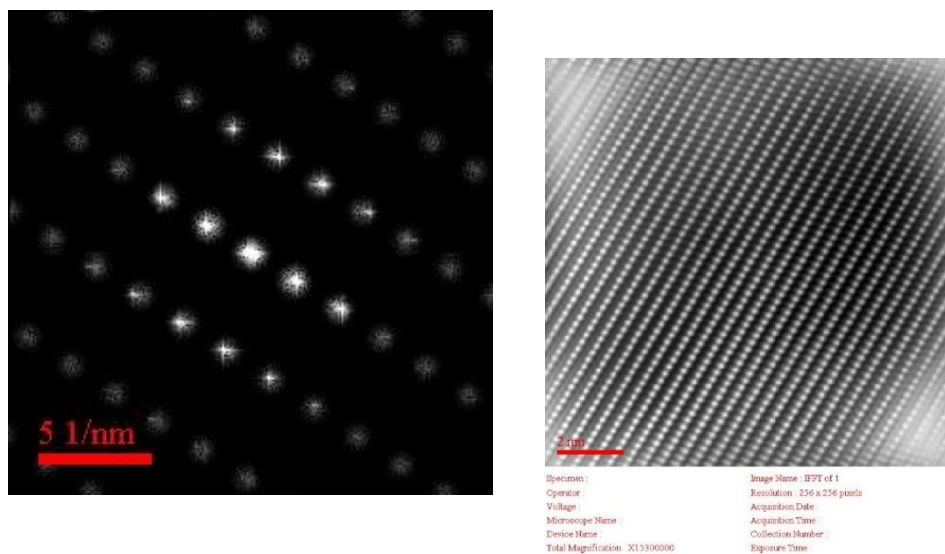

**Figure S8: Tem Image  $\text{Mn}_3\text{O}_4/\text{rGO}$**



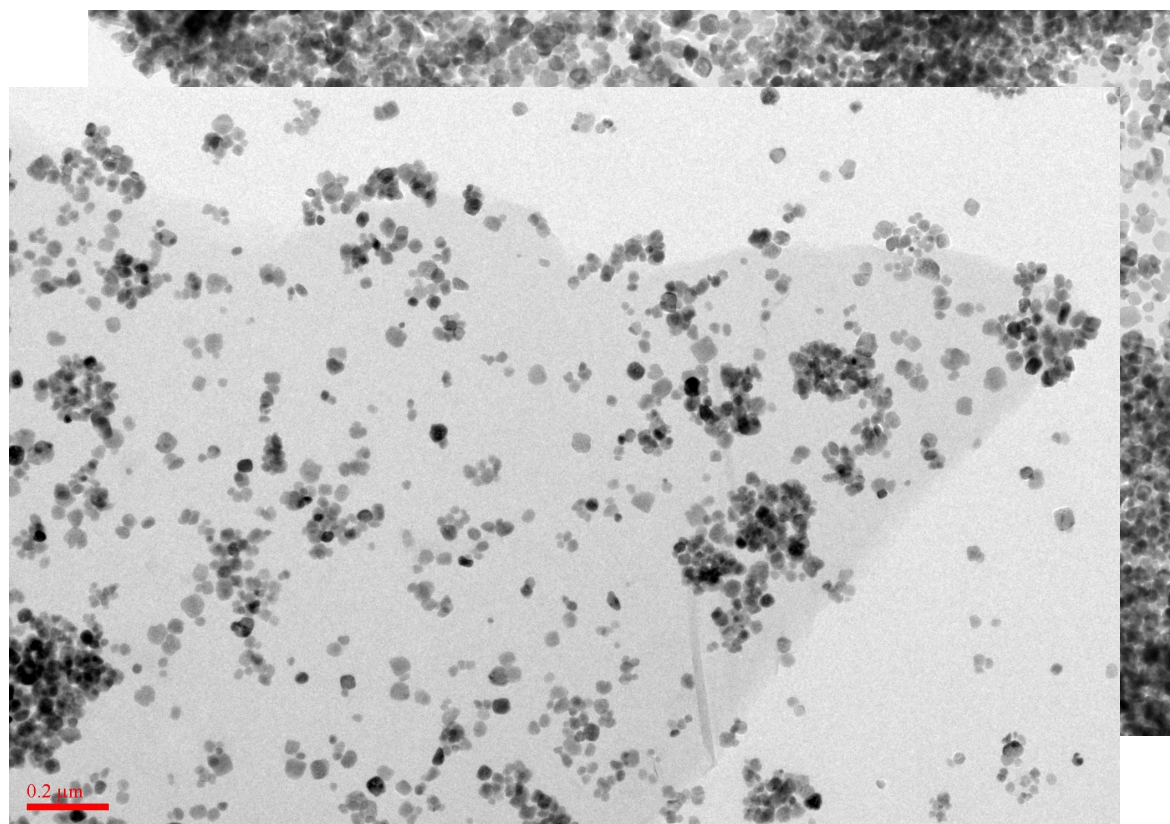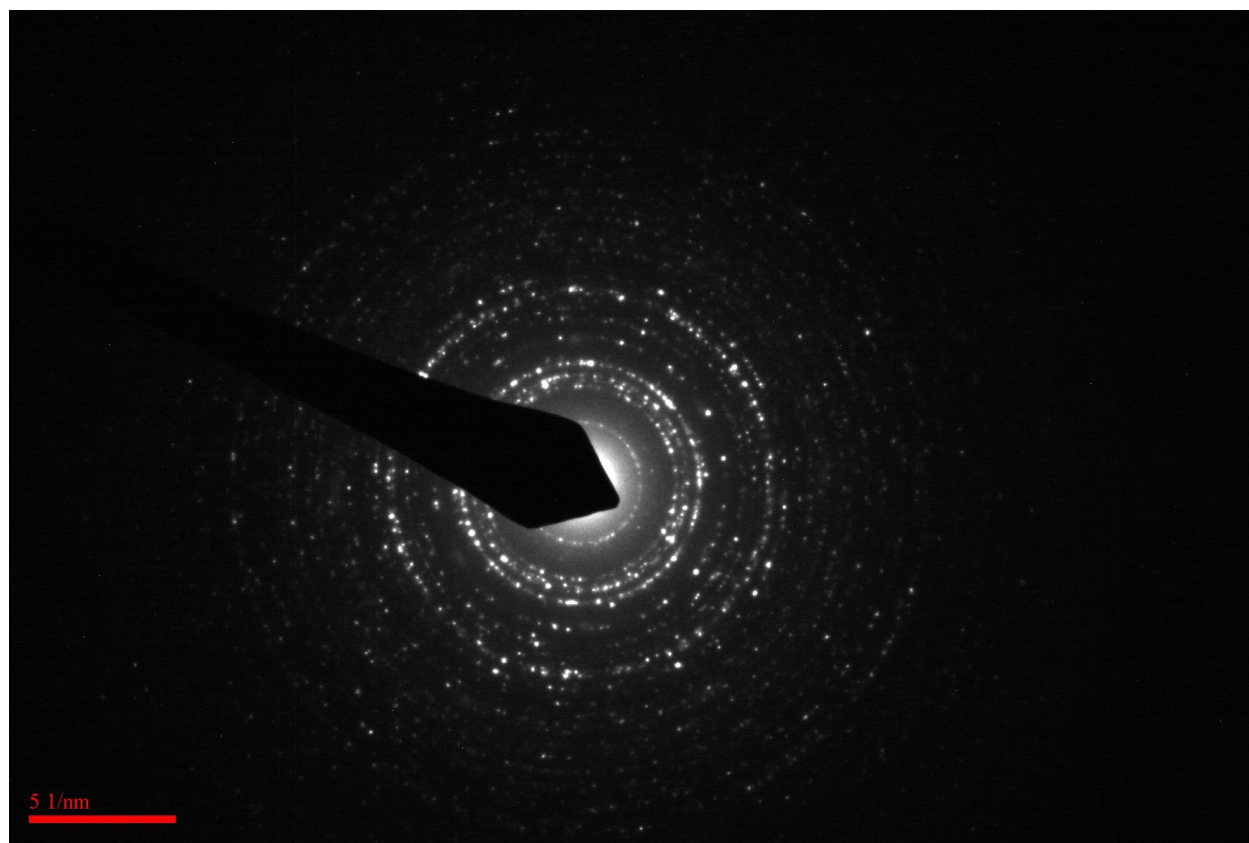

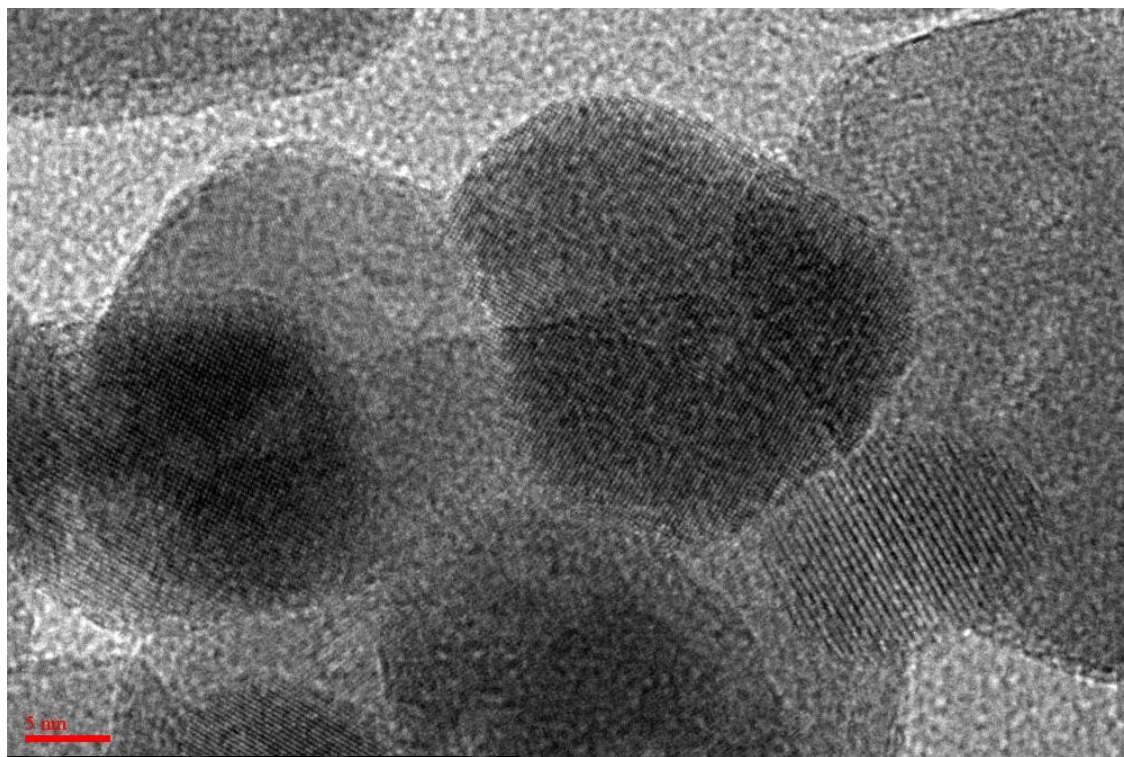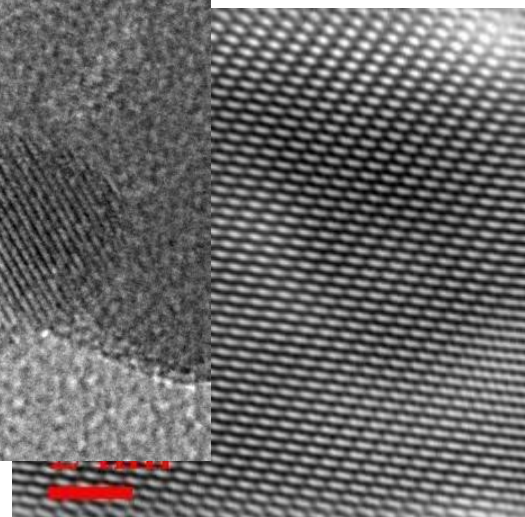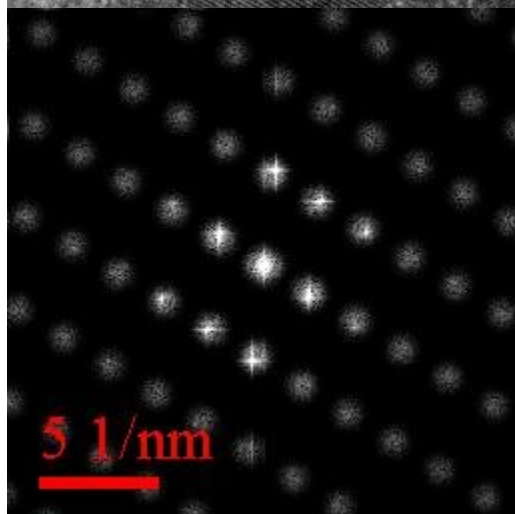

**Figure S9: Sem Image of  $\text{Mn}_3\text{O}_4$**

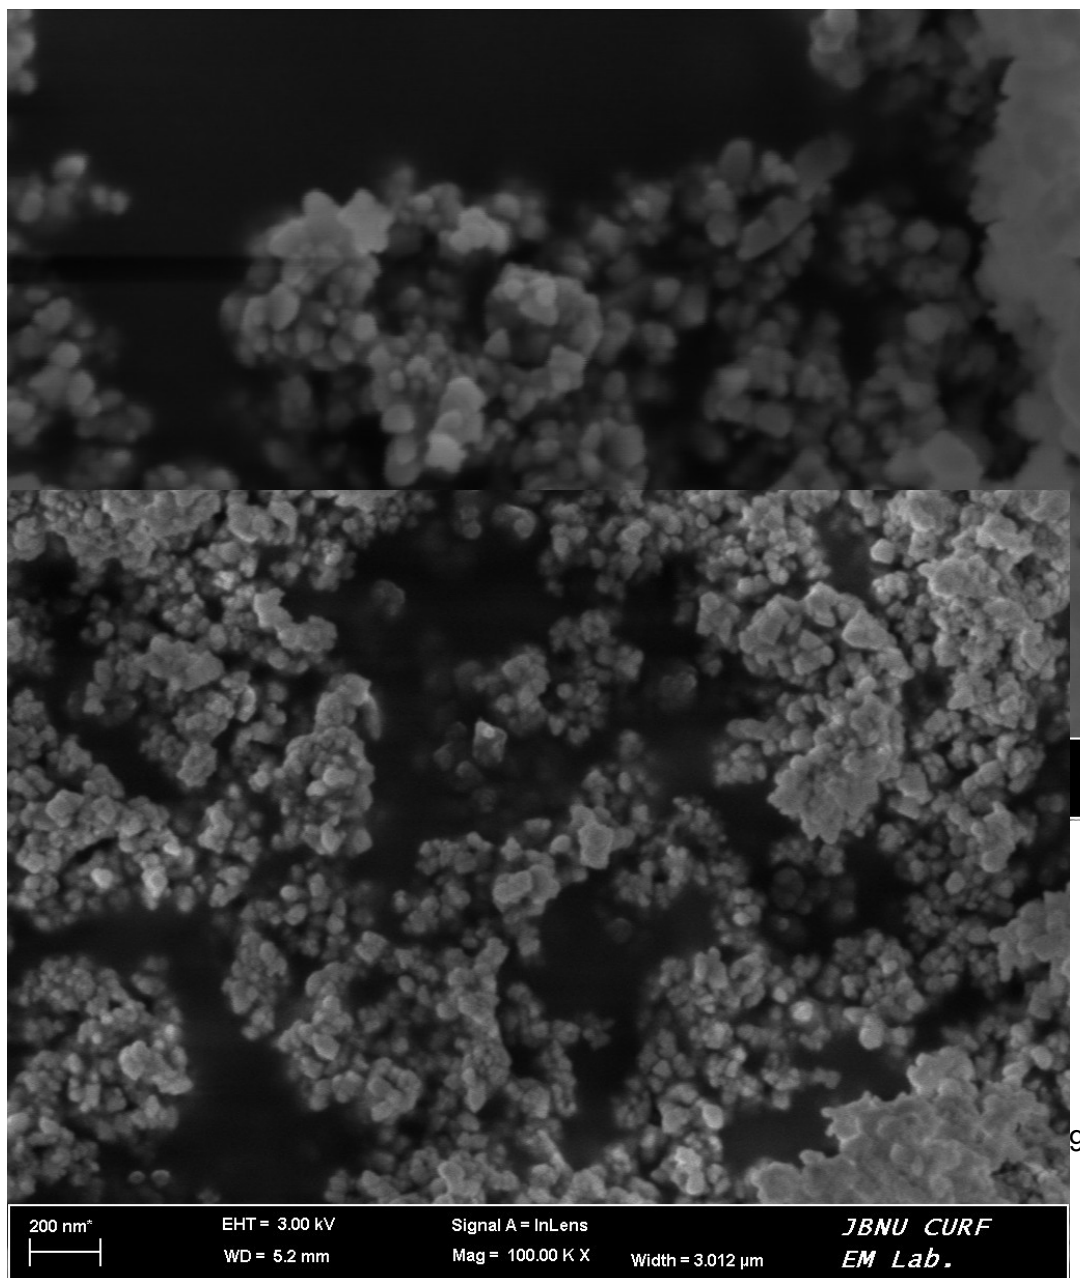



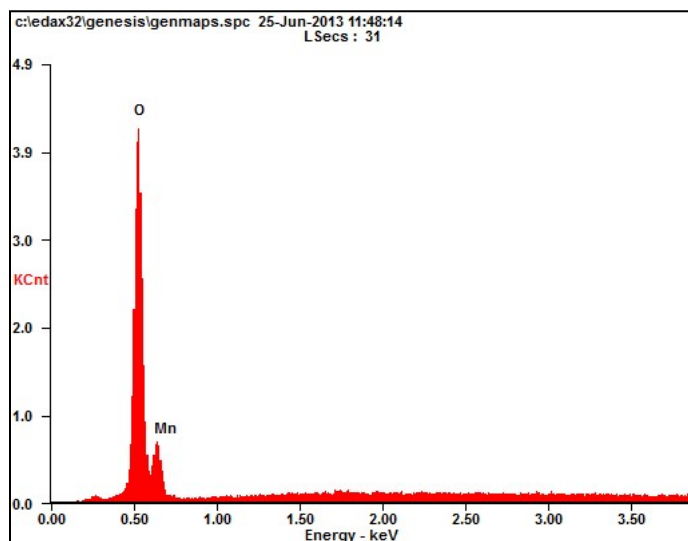

| <i>Element</i> | <i>Wt%</i> | <i>At%</i> |
|----------------|------------|------------|
| <i>OK</i>      | 26.60      | 55.44      |
| <i>MnK</i>     | 73.40      | 44.56      |
| <i>Matrix</i>  | Correction | ZAF        |

EDAX mapping of  $\text{Mn}_3\text{O}_4$

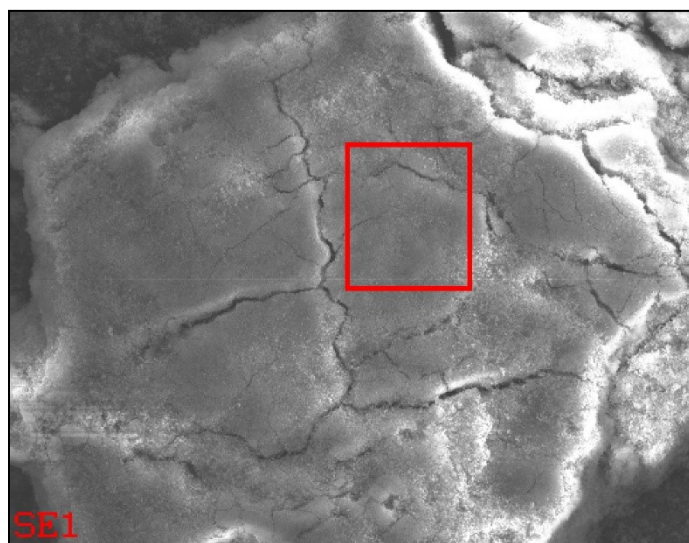

**Figure S10: Sem Image of Mn<sub>3</sub>O<sub>4</sub>/rGO**

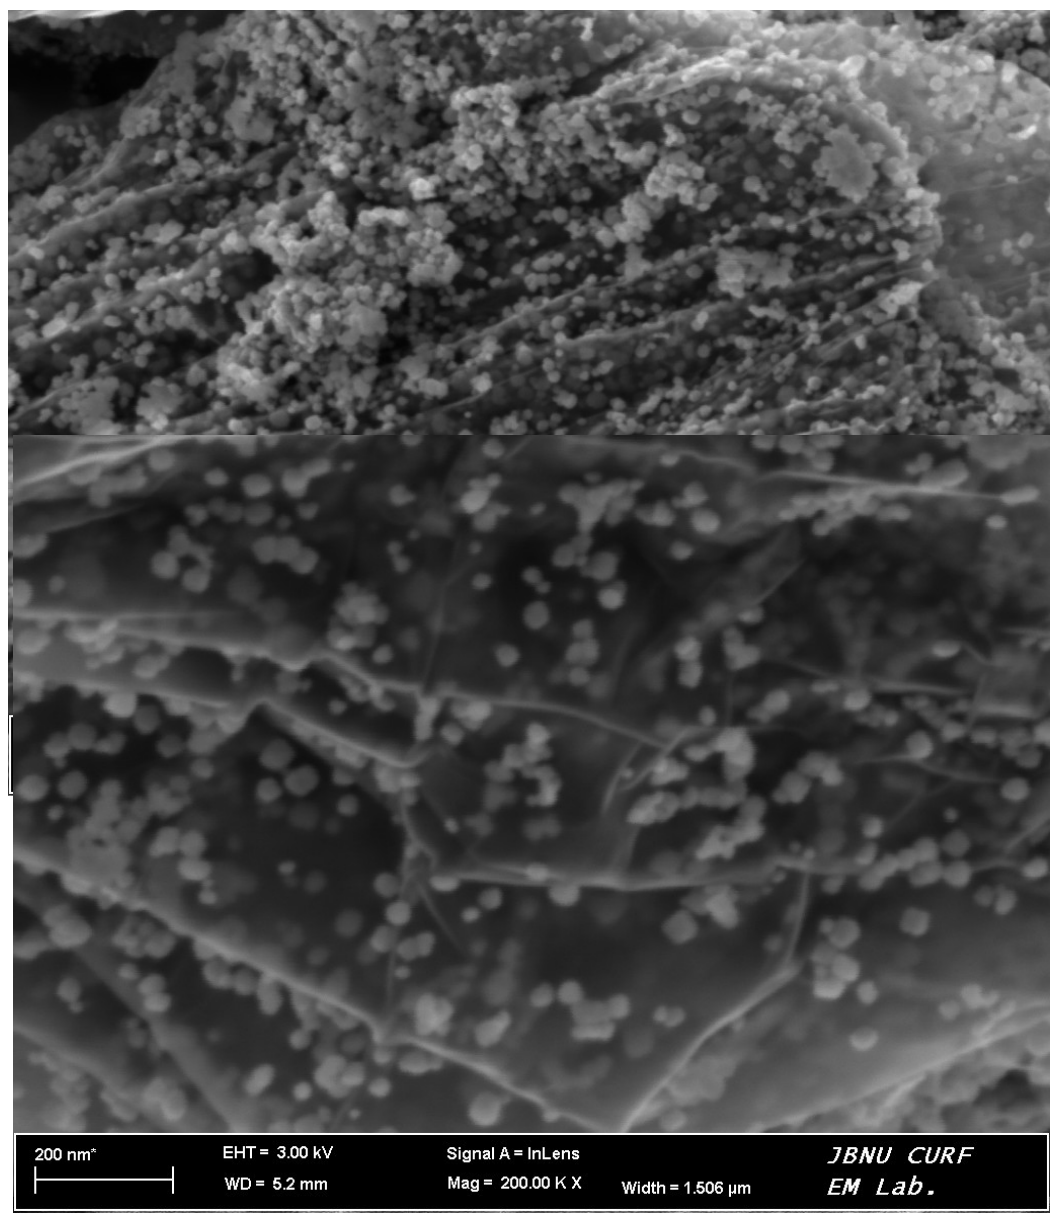

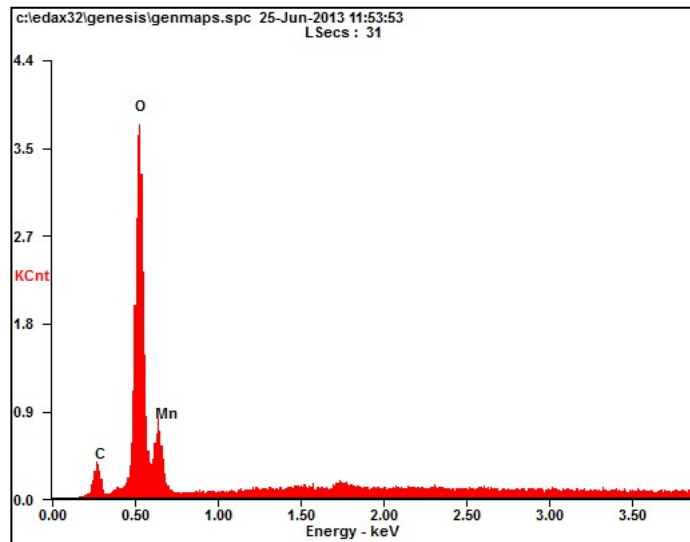

Edax mapping of Mn<sub>3</sub>O<sub>4</sub>/rGO

| <i>Element</i> | <i>Wt%</i> | <i>At%</i> |
|----------------|------------|------------|
| <i>CK</i>      | 05.91      | 14.54      |
| <i>OK</i>      | 26.58      | 49.12      |
| <i>MnK</i>     | 67.52      | 36.34      |
| <i>Matrix</i>  | Correction | ZAF        |

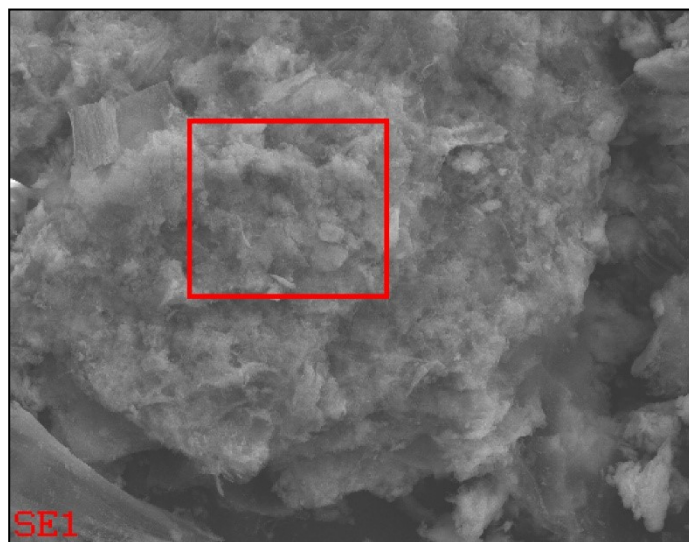

**Figure S11: TEM Image GO**

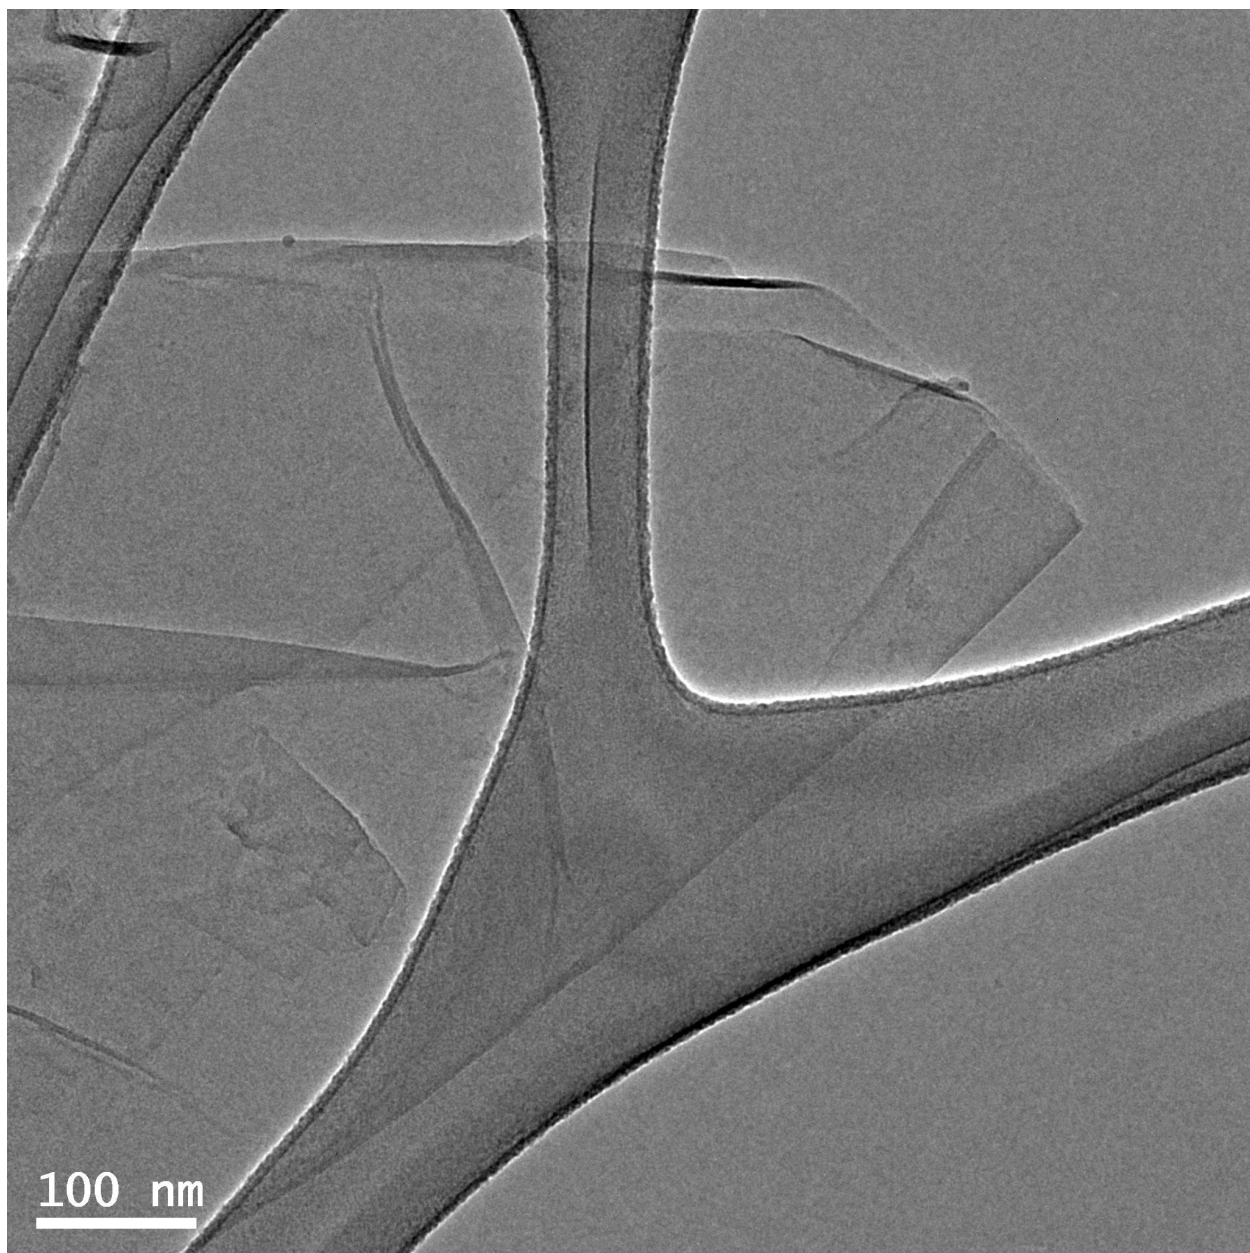

**Figure S12: TEM Image rGO**



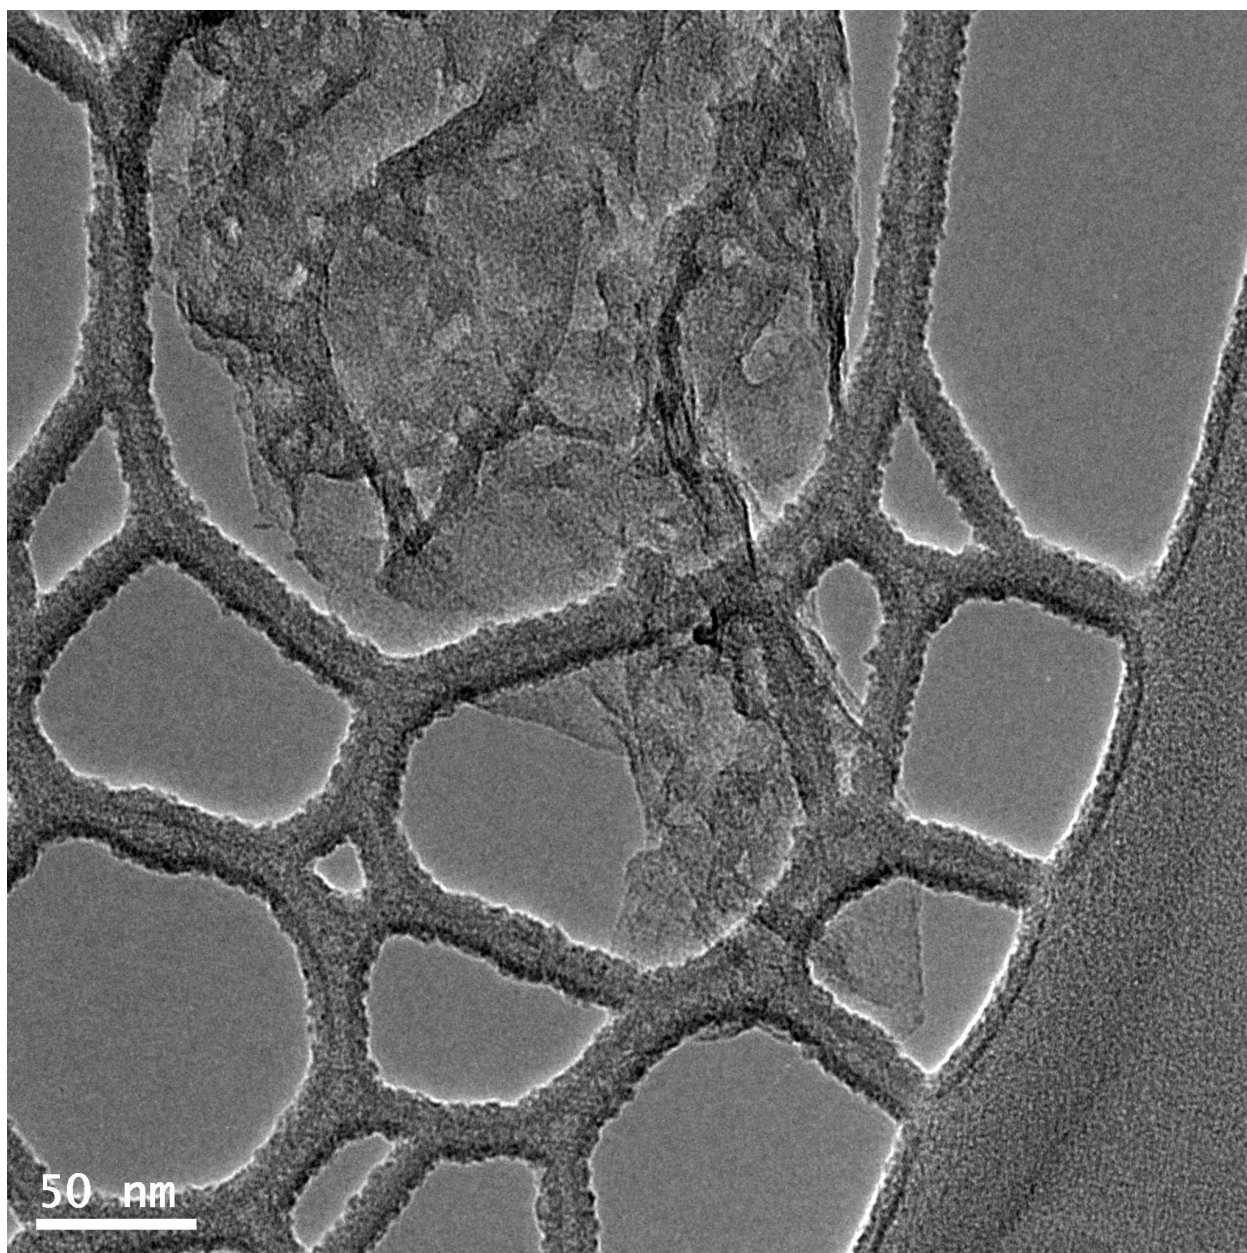

**Figure S13: SEM Image of GO**

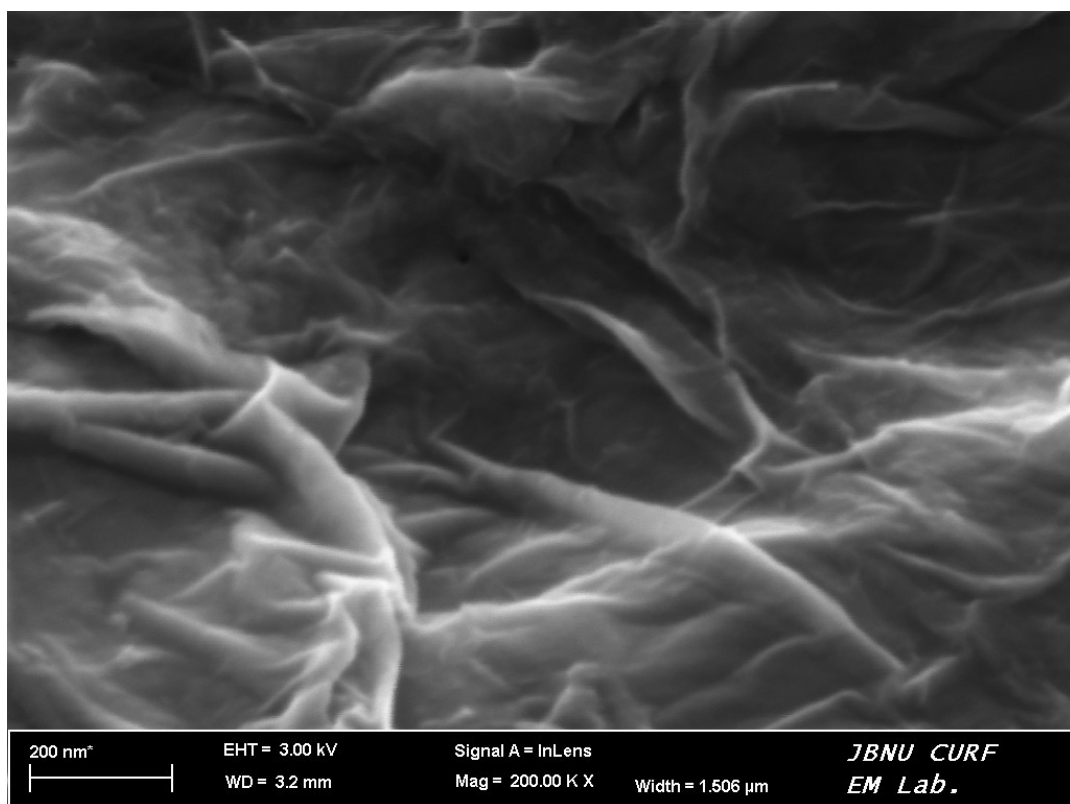

| <i>Element</i> | <i>Wt%</i> | <i>At%</i> |
|----------------|------------|------------|
| <b>CK</b>      | 48.19      | 55.34      |

### EDAX mapping of GO

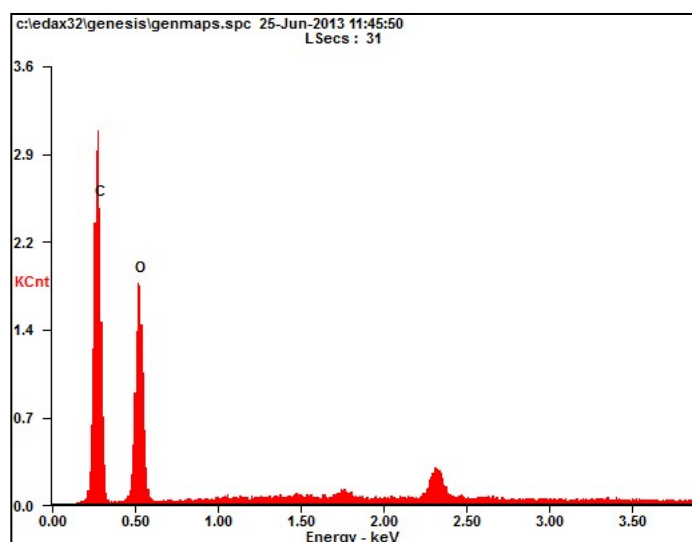

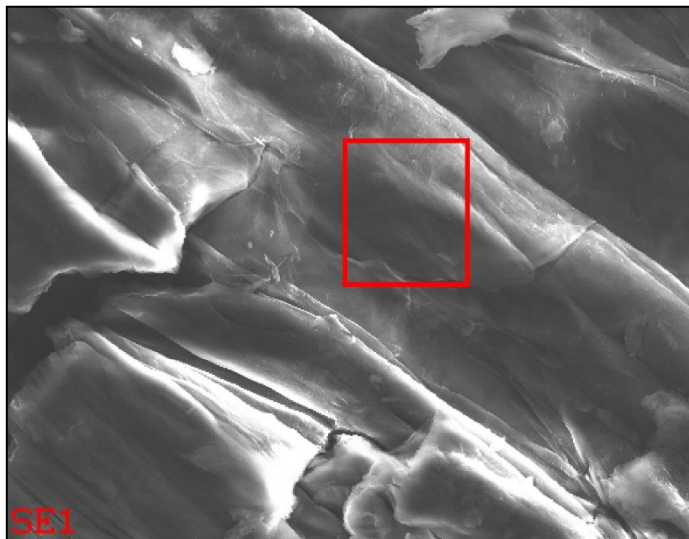

|               |            |       |
|---------------|------------|-------|
| <i>OK</i>     | 51.81      | 44.66 |
| <i>Matrix</i> | Correction | ZAF   |

**Figure S14: SEM Image of rGO**

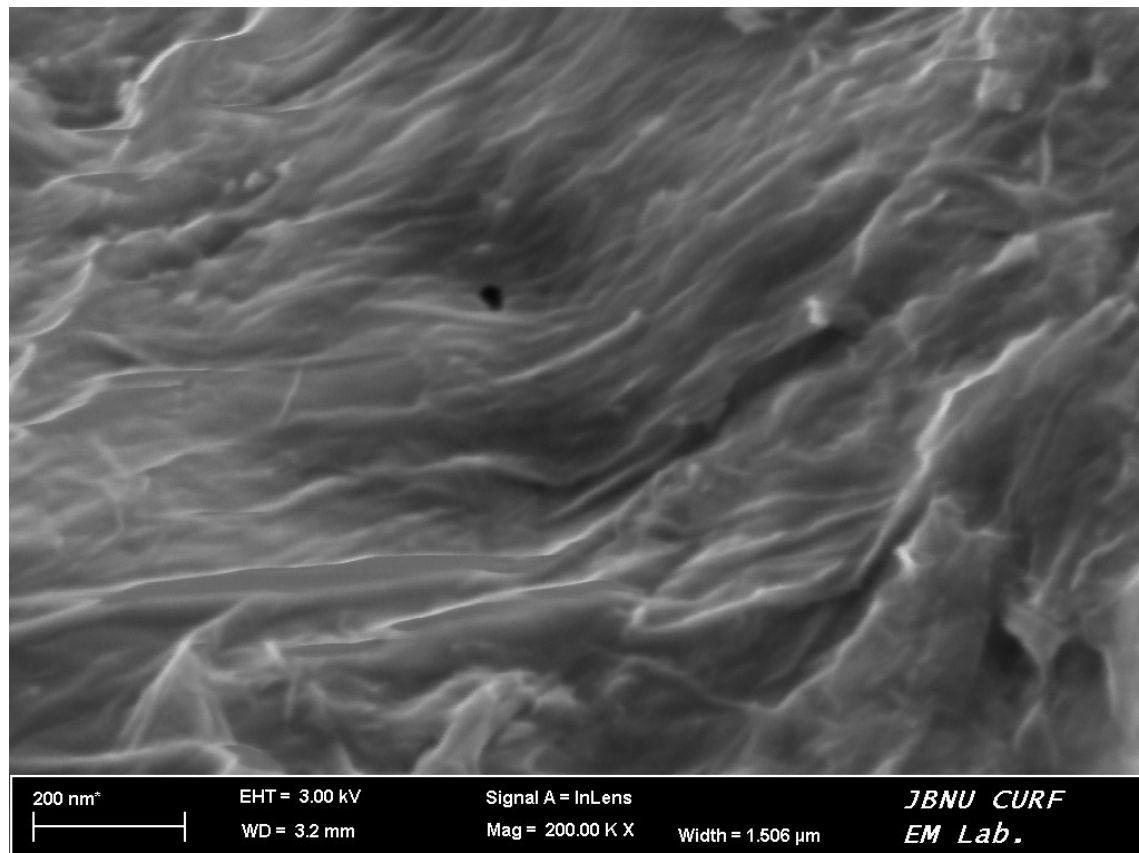

## EDAX mapping of rGO

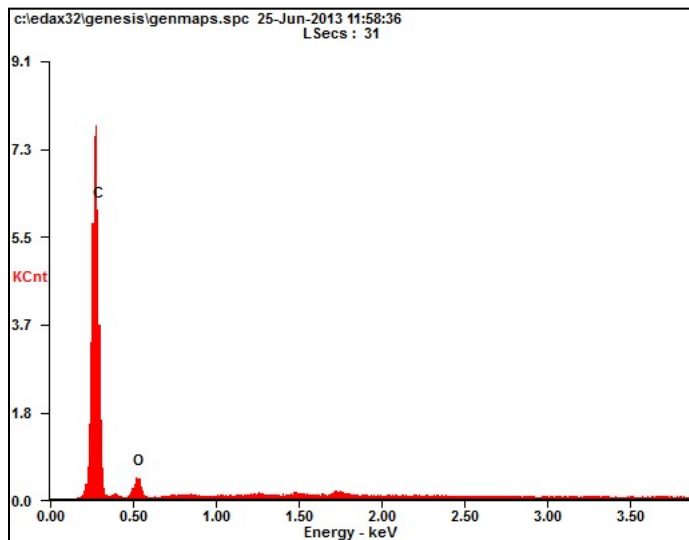

| <i>Element</i> | <i>Wt%</i> | <i>At%</i> |
|----------------|------------|------------|
| <b>CK</b>      | 82.41      | 86.19      |
| <b>OK</b>      | 17.59      | 13.81      |
| <b>Matrix</b>  | Correction | ZAF        |

## References-

1. Yang, K.; Huang, X.; Fang, L.; He, J.; Jiang, P. Fluoro-polymer functionalized graphene for flexible ferroelectric polymer-based high-k nanocomposites with suppressed dielectric loss and low percolation threshold. *Nanoscale* **2014**, 6(24), 14740–14753. doi:10.1039/C4NR03957B.
2. Díez, N.; Śliwak, A.; Gryglewicz, S.; Grzyb, B.; Gryglewicz, G. Enhanced reduction of graphene oxide by high-pressure hydrothermal treatment. *RSC Advances* **2015**, 5(100), 81831–81837. doi:10.1039/C5RA14461B.
3. Huang, H.-H.; De Silva, K. K. H.; Kumara, G. R. A.; Yoshimura, M. Structural Evolution of Hydrothermally Derived Reduced Graphene Oxide. *Scientific Reports* **2018**, 8(1), 6849. doi:10.1038/s41598-018-25194-1.
4. Chee, W. K.; Lim, H. N.; Zainal, Z.; Huang, N. M.; Harrison, I.; Andou, Y. Flexible Graphene-Based Supercapacitors: A Review. *The Journal of Physical Chemistry C* **2016**, 120(8), 4153–4172. doi:10.1021/acs.jpcc.5b10187.
